# Supplementary material
Source: PubMed Central journal article supplement (PMC10545992)
Supplement: jcsm.10698.sm001.pdf [file jcsm.10698.sm001.pdf]

**Figure S1**—Change in PGIC ratings in subgroups by sex (A), age (B), baseline treatment (C), and LXB dosing regimen (D).

**A. Sex**

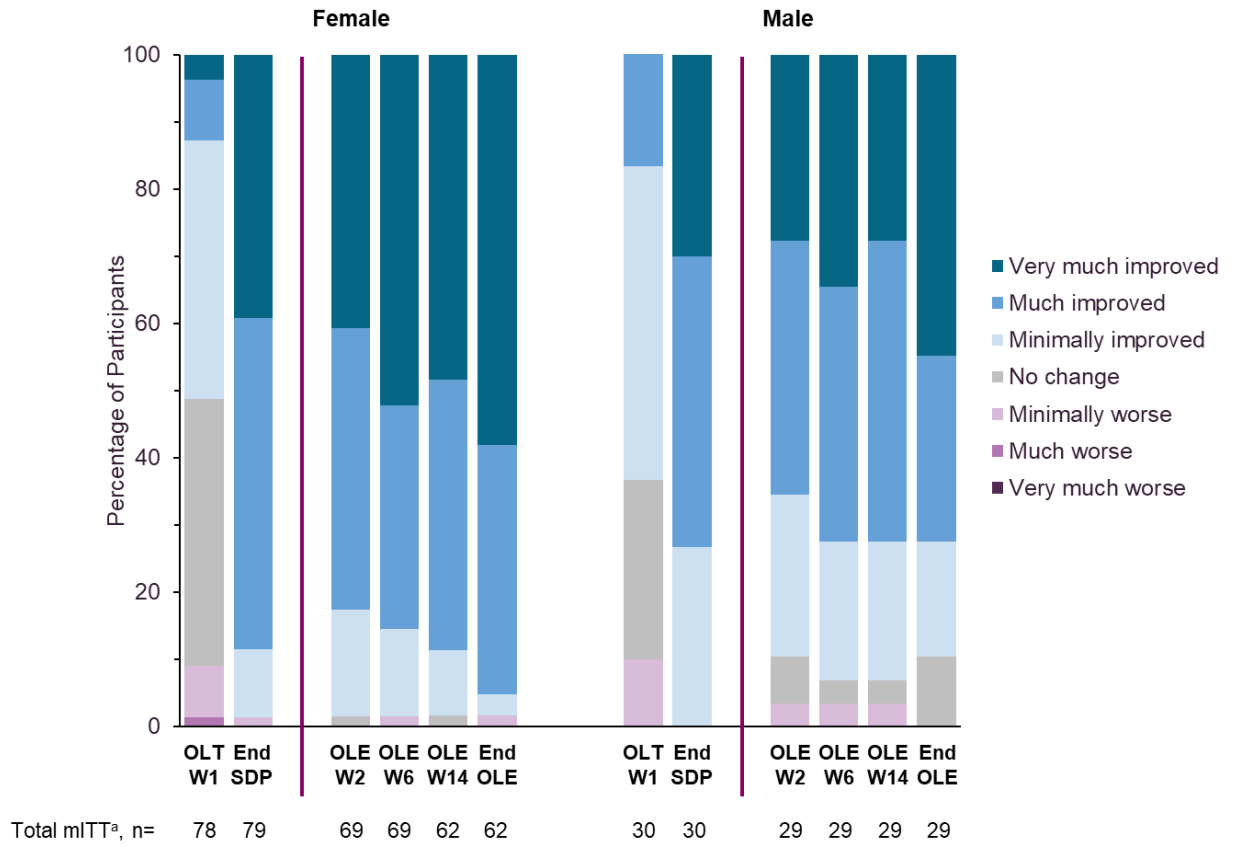

**B. Age**

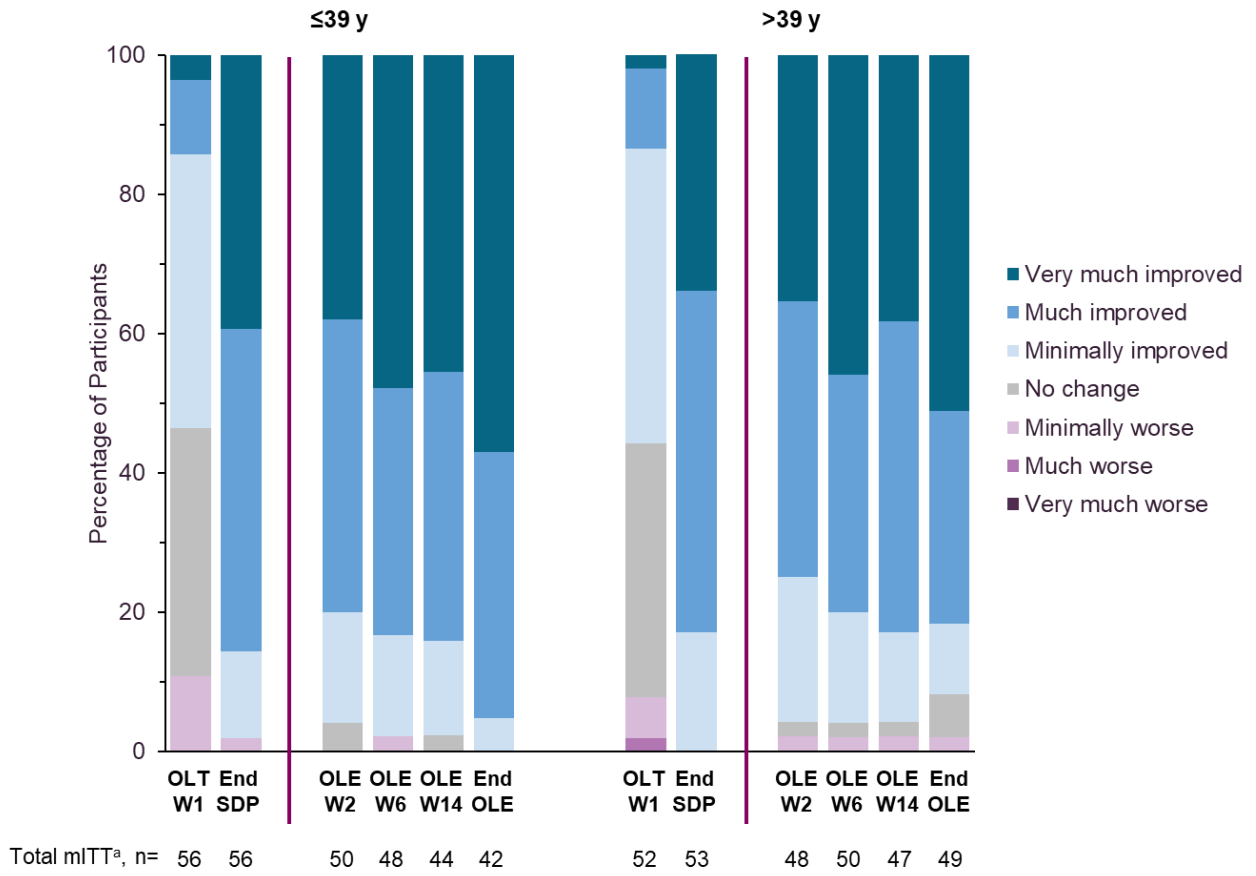

### C. Baseline Treatment

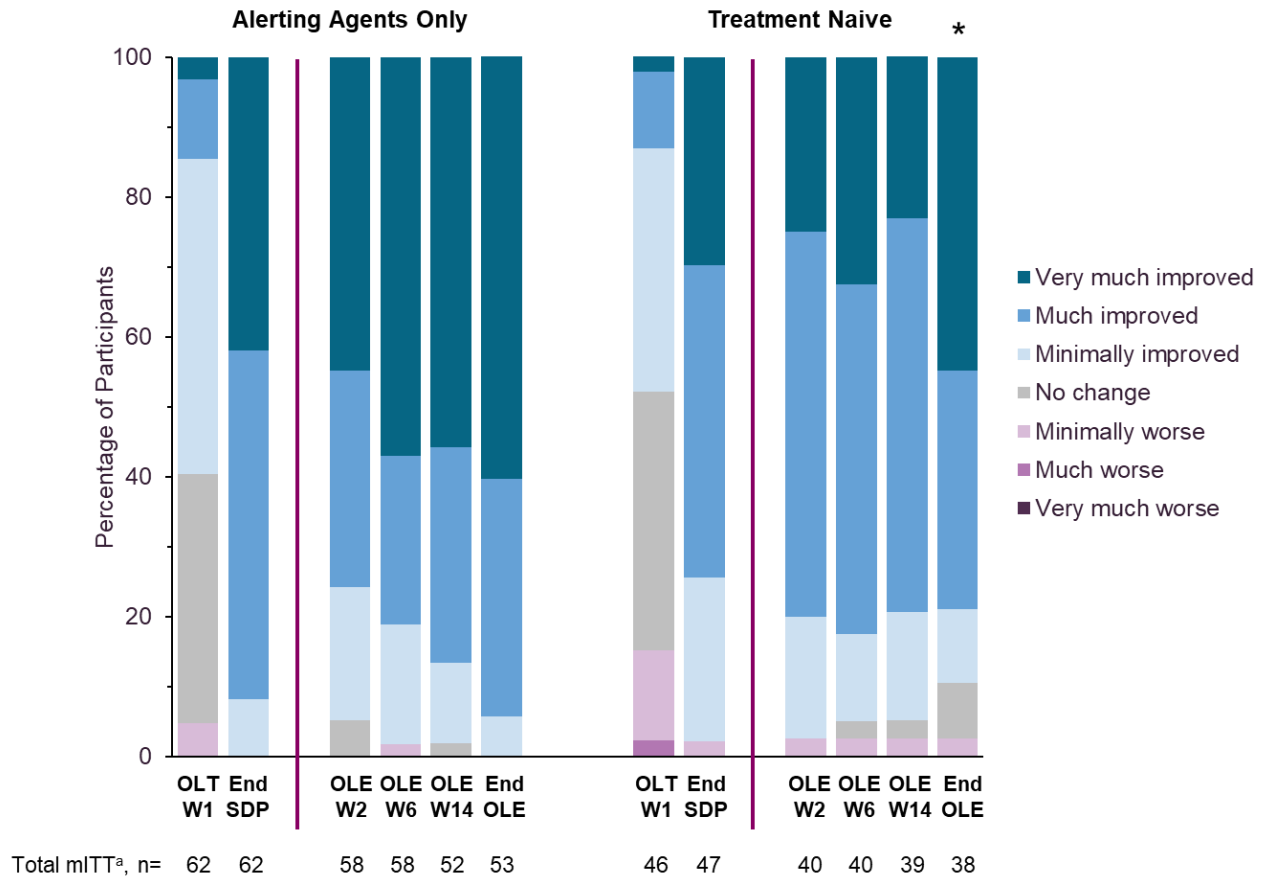

## D. LXB Dosing Regimen

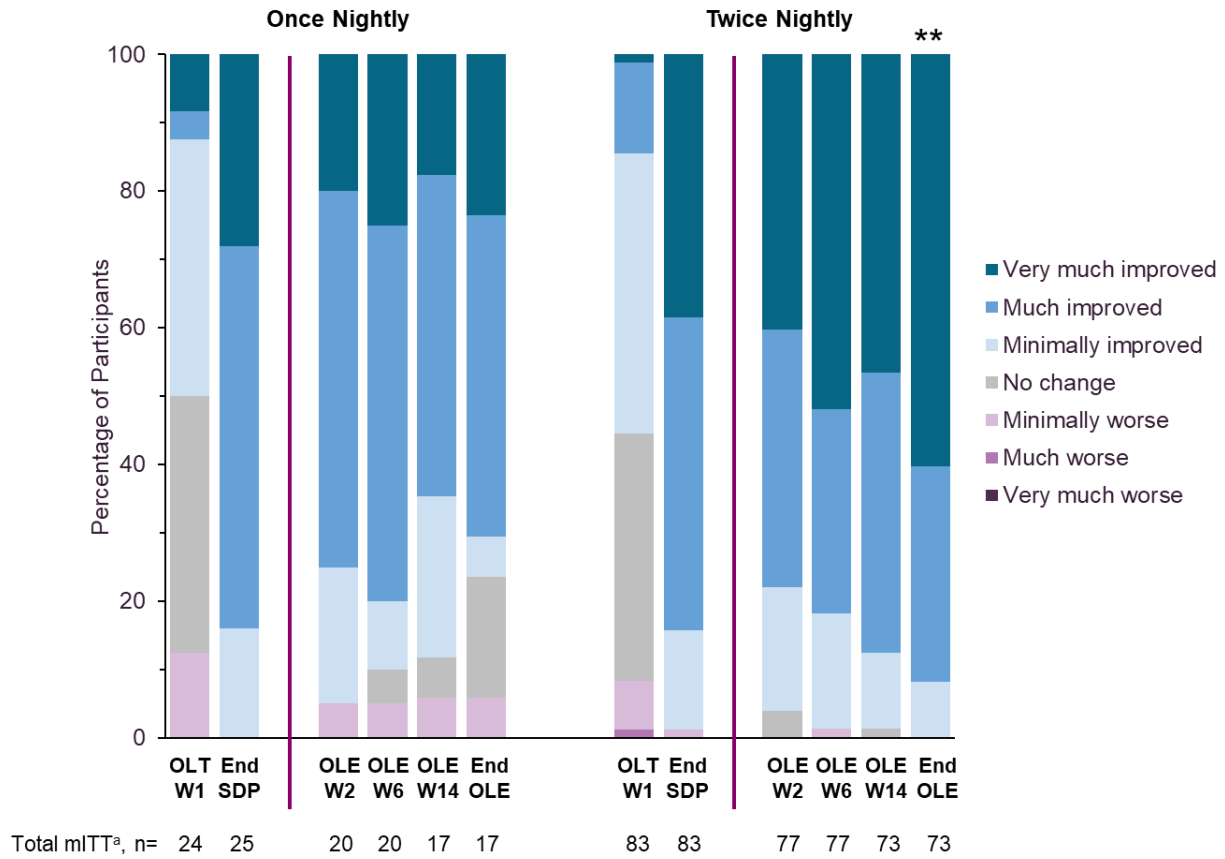

LXB, low-sodium oxybate; mITT, modified intent-to-treat; OLE, open-label extension period; OLT, open-label titration and optimization period; PGIC, Patient Global Impression of Change; SDP, stable-dose period; W, week.

<sup>a</sup>mITT population excludes participants taking high-sodium oxybate at baseline (n=6). Due to no adjustments for multiplicity, *P* values are nominal. Statistical tests are for the proportions who improved to any extent (minimally, much, or very much improved).

\**P*<0.05 vs alerting agents only; \*\**P*<0.001 vs once nightly.

**Table S1**—TEAEs newly reported<sup>a,b</sup> during OLE.

| TEAE, n (%)                                  | Alerting Agents Only<br>(n=60) | Treatment Naive<br>(n=41) | Total<br>(N=106) |
|----------------------------------------------|--------------------------------|---------------------------|------------------|
| Any TEAE (new to a participant) <sup>a</sup> | 31 (51.7)                      | 15 (36.6)                 | 48 (45.3)        |
| TEAEs in $\geq 2$ participants               |                                |                           |                  |
| Nasopharyngitis                              | 3 (5.0)                        | 3 (7.3)                   | 7 (6.6)          |
| Upper respiratory tract infection            | 3 (5.0)                        | 2 (4.9)                   | 5 (4.7)          |
| Hypertension                                 | 3 (5.0)                        | 1 (2.4)                   | 4 (3.8)          |
| Vomiting                                     | 4 (6.7)                        | 0                         | 4 (3.8)          |
| Anxiety                                      | 3 (5.0)                        | 0                         | 3 (2.8)          |
| Diarrhea                                     | 3 (5.0)                        | 0                         | 3 (2.8)          |
| Sinusitis                                    | 1 (1.7)                        | 2 (4.9)                   | 3 (2.8)          |
| Fatigue                                      | 2 (3.3)                        | 0                         | 3 (2.8)          |
| Night sweats                                 | 1 (1.7)                        | 1 (2.4)                   | 3 (2.8)          |
| Pain in extremity                            | 2 (3.3)                        | 0                         | 3 (2.8)          |
| Abdominal pain upper                         | 1 (1.7)                        | 1 (2.4)                   | 2 (1.9)          |
| Alopecia                                     | 1 (1.7)                        | 1 (2.4)                   | 2 (1.9)          |
| Arthropod bite                               | 2 (3.3)                        | 0                         | 2 (1.9)          |
| Bronchitis                                   | 1 (1.7)                        | 1 (2.4)                   | 2 (1.9)          |
| Enuresis                                     | 2 (3.3)                        | 0                         | 2 (1.9)          |
| Hemorrhoids                                  | 1 (1.7)                        | 1 (2.4)                   | 2 (1.9)          |
| Insomnia                                     | 2 (3.3)                        | 0                         | 2 (1.9)          |
| Libido decreased                             | 0                              | 2 (4.9)                   | 2 (1.9)          |
| Muscle spasms                                | 2 (3.3)                        | 0                         | 2 (1.9)          |
| Myalgia                                      | 2 (3.3)                        | 0                         | 2 (1.9)          |
| Pharyngitis                                  | 1 (1.7)                        | 1 (2.4)                   | 2 (1.9)          |
| Rash                                         | 1 (1.7)                        | 1 (2.4)                   | 2 (1.9)          |
| Urinary tract infection                      | 0                              | 2 (4.9)                   | 2 (1.9)          |
| Any TEAE (new to OLE) <sup>b</sup>           | 18 (30.0)                      | 9 (22.0)                  | 29 (27.4)        |
| TEAEs in $\geq 2$ participants               |                                |                           |                  |
| Hypertension                                 | 3 (5.0)                        | 1 (2.4)                   | 4 (3.8)          |
| Alopecia                                     | 1 (1.7)                        | 1 (2.4)                   | 2 (1.9)          |
| Hemorrhoids                                  | 1 (1.7)                        | 1 (2.4)                   | 2 (1.9)          |
| Libido decreased                             | 0                              | 2 (4.9)                   | 2 (1.9)          |

OLE, open-label extension period; TEAE, treatment-emergent adverse event.

<sup>a</sup>TEAE that was not reported by that same participant in the main study.

<sup>b</sup>TEAE that was not reported by any participants in the main study.
